# Supplementary material for: A new procedure for processing eddy-covariance data to better quantify atmosphere-aquatic ecosystem CO&lt;sub&gt;2&lt;/sub&gt; exchanges
Source: Copernicus journal article supplement (doi:10.5194/bg-2017-499), 2017-12-14

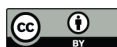

1 **A new procedure for processing eddy-covariance data to better**  
2 **quantify atmosphere-aquatic ecosystem CO<sub>2</sub> exchanges**

3

4 Tatsuki Tokoro<sup>1,2</sup> Tomohiro Kuwae<sup>1</sup>

5 <sup>1</sup>Coastal and Estuarine Research Group, Port and Airport Research Institute, 3-1-1

6 Nagase, Yokosuka 239-0826, Japan

7 <sup>2</sup>Present address: Marine Macrophyte Ecosystem Group, National Research Institute of

8 Fisheries and Environment of Inland Sea, 2-17-5, Hatsukaichi 739-0452, Japan

9 *Correspondence to:* T. Tokoro (tokoro-t@ipc.pari.go.jp)

10

11 **Abstract.** The capture of carbon by aquatic ecosystems and its sequestration in  
12 sediments has been studied as a potential method for mitigating the adverse effects of  
13 climate change. However, the evaluation of in situ atmospheric CO<sub>2</sub> fluxes is  
14 challenging because of the difficulty in making continuous measurements over areas  
15 and for periods of time that are environmentally relevant. The eddy covariance (EC)  
16 method is the most promising approach to address this concern with the measurement of  
17 atmospheric CO<sub>2</sub> fluxes. However, methods to process the data obtained from EC  
18 measurements are still being developed, and the estimated air-water CO<sub>2</sub> fluxes have  
19 large uncertainties and differ from those obtained using conventional methods. In this  
20 study, we improved the post-processing procedure for the EC method to reduce the  
21 uncertainty in the measured air-water CO<sub>2</sub> fluxes. Our new procedure efficiently  
22 removes erroneous fluxes using a combination of filtering methods based on the  
23 received signal strength indicator of the EC sensor, the normalized standard deviation of

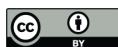

24 atmospheric CO<sub>2</sub> and water vapor concentrations, and a high-pass filter. Our procedure  
25 is easier to apply to EC measurements than existing correction methods. The improved  
26 EC fluxes did not always agree with those obtained by using conventional methods  
27 (e.g., the bulk formula method), but this difference was attributable to the difference of  
28 measurement heights and the effect on the measured fluxes of the physical and  
29 biological properties of the water surface (e.g., the presence of vegetation on the water  
30 surface and the temperature gradient in the overlying atmospheric layer). Because the  
31 measurement height and the spatiotemporal scales of the flux measurement depend on  
32 the applied method, it is essential to select the appropriate method for studies related to  
33 CO<sub>2</sub> fluxes and to the determination of ecosystem-atmospheric CO<sub>2</sub> interactions and the  
34 role of aquatic ecosystems in mitigating the adverse effects of climate change.

## 35 **1 Introduction**

36 Aquatic environments are considered critical to the mitigation of adverse climate  
37 change effects because of their ability to store atmospheric CO<sub>2</sub>. Previous studies have  
38 estimated that the ocean absorbs approximately one-fourth of the CO<sub>2</sub> emitted by  
39 anthropogenic activities (IPCC, 2013). However, the effect of shallow aquatic  
40 ecosystems on atmospheric CO<sub>2</sub> remains a controversial topic. Several previous studies  
41 have concluded that shallow aquatic ecosystems are sources of atmospheric CO<sub>2</sub> after  
42 taking account of carbon inputs from land (e.g. Gazeau et al., 2005; Borges et al., 2006;  
43 Chen et al., 2013). In contrast, some autotrophic, shallow aquatic ecosystems have been  
44 reported to be net sinks for atmospheric CO<sub>2</sub> (e.g. Schindler et al., 1997; Tokoro et al.,  
45 2014).

46 In situ measurements of atmospheric CO<sub>2</sub> fluxes are necessary for precise analysis



47 of carbon cycling in aquatic environments. CO<sub>2</sub> fluxes in aquatic environments are  
48 difficult to determine because of the variability of several factors, including  
49 concentrations of CO<sub>2</sub> in the water and air and the physical characteristics of the  
50 atmosphere and water surface. Several methods have been proposed for measuring in  
51 situ CO<sub>2</sub> fluxes. Because each of these methods works best at a different combination of  
52 spatial and temporal scales and is associated with different costs and technical  
53 difficulties, a variety of methods have been applied to different aquatic environments  
54 (e.g. oceans, estuaries, and lakes) to assess rates of aquatic carbon cycling.

55 Methods of estimating air-water CO<sub>2</sub> fluxes can be assigned to one of two  
56 categories: (1) indirect estimations based on CO<sub>2</sub> concentration gradients just below the  
57 water surface (Lewis and Whitman, 1924) or from the renewal rate of a very small body  
58 of water (Danckwerts, 1951), and (2) direct estimations. With either of the indirect  
59 methods, the CO<sub>2</sub> flux is calculated from the product of the difference in the CO<sub>2</sub>  
60 fugacity (fCO<sub>2</sub>) between air and water, the CO<sub>2</sub> solubility, and a physically regulated  
61 parameter called the transfer velocity. Because the transfer velocity cannot be estimated  
62 directly, empirical and hydrodynamic models for estimating transfer velocity have been  
63 proposed (Garbe et al., 2013).

64 At the present time, the empirical model is primarily used for evaluating aquatic  
65 CO<sub>2</sub> fluxes because of the difficulty in applying the hydrodynamic model. In the  
66 empirical model, the regulating factor for transfer velocity has been identified from  
67 several direct CO<sub>2</sub> measurements by using tracers such as <sup>14</sup>C and SF<sub>6</sub> (e.g. Broecker  
68 and Peng 1982; Ho et al., 2014) or water-tank experiments (e.g. Komori et al., 1993).  
69 Based on these results, several empirical equations have been formulated. The wind  
70 speed above the water surface is a metric of one regulating factor (e.g. Liss and



71 Merlivat, 1986; Wanninkhof, 1992; Ho et al., 2006). In the case of shallow systems,  
72 water velocity fields and depths have been used to estimate the gas transfer velocity  
73 (O’Conner and Dobbins, 1958; Borges et al., 2004). In this study, the method using such  
74 empirical model for estimating aquatic CO<sub>2</sub> flux is defined as the Bulk Formula method  
75 (BF method).

76 However, application of the BF method is limited because of its poor temporal and  
77 spatial coverage. Moreover, in previous studies, air-water CO<sub>2</sub> fluxes have been  
78 determined mostly as snapshots that did not account for diurnal changes or annual  
79 cycles, the result being considerable uncertainty and bias (Kuwae et al., 2016). In  
80 brackish environments in particular, temporal variability of water fCO<sub>2</sub> is significant,  
81 whereas the carbonate buffer effect is weak, and the fluctuations of fCO<sub>2</sub> become very  
82 large (Zeebe and Wolf-Gladrow, 2001). Use of BF methods to carry out a  
83 comprehensive analysis of dynamic carbon cycling in aquatic environments with large  
84 spatial and temporal variability would therefore be very costly and require much effort.

85 Another method for evaluating the air-water CO<sub>2</sub> fluxes is direct measurement of in  
86 situ fluxes, which involves use of a chamber floating on the water surface (e.g.  
87 Frankignoulle, 1988; Tokoro et al., 2008) and eddy covariance devices (see [Figure 1](#)). The  
88 floating chamber method is used to determine the air-water CO<sub>2</sub> flux from continuous  
89 measurements of CO<sub>2</sub> concentrations in the air inside a hollow, box-shaped device  
90 floating on the water surface. Although this method is the easiest of the direct methods  
91 to use in shallow coastal waters because of its relative simplicity, like the BF method, it  
92 is poorly suited for obtaining long-term measurements over wide areas.

93 The eddy covariance (EC) method, which is commonly used to determine mass and  
94 heat fluxes in terrestrial environments, has recently been used to estimate air-water



95 fluxes of greenhouse gases (Lee et al., 2004). The determination of the EC CO<sub>2</sub> flux  
96 is based on the micro-meteorological behavior of atmospheric eddy diffusion and is  
97 calculated from the covariance of atmospheric CO<sub>2</sub> concentrations and vertical wind  
98 speeds measured at high frequency (more than 10 Hz). Because EC measurements can  
99 be performed automatically and represent the flux over a large area, the EC method can  
100 be used to obtain a detailed analysis of CO<sub>2</sub> fluxes.

101 Despite the promise of EC measurements, application of the EC method in aquatic  
102 environments remains challenging (Tsukamoto et al., 2004; Rutgersson and Smedman,  
103 2010; Vesala, 2012; Blomquist et al., 2013; Kondo et al., 2014; Ikawa and Oechel,  
104 2014; Landwehr et al., 2014). The difficulty of making aquatic EC measurements is that  
105 the air-water CO<sub>2</sub> flux is small compared with the air-land CO<sub>2</sub> flux (Vesala, 2012;  
106 Landwehr et al., 2014). The main technical problem with the EC method is cross  
107 sensitivity, which reflects the interference between the atmospheric CO<sub>2</sub> and H<sub>2</sub>O  
108 measurements caused by spectrometric error (Kohsiek et al., 2000; Prytherch et al.,  
109 2010; Kondo et al., 2014; Landwehr et al., 2014). A procedure based on the relationship  
110 between atmospheric CO<sub>2</sub> concentration and relative humidity called the PKT  
111 correction has been proposed to correct for the effects of cross sensitivity (Prytherch et  
112 al., 2010). However, the PKT correction is not always effective. Past studies have  
113 revealed that cross sensitivity is reduced only after application of certain operational  
114 procedures such as cleaning the optical lens of the sensor (Ikawa and Oechel, 2014;  
115 Kondo et al., 2014) and drying the sample gas (Landwehr et al., 2014).

116 There are several problems in addition to cross sensitivity in using EC  
117 measurements in aquatic environments. The uncertainty of EC measurements has been  
118 attributed to the spatial and temporal heterogeneity of water (Mørk et al., 2014). The EC

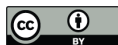

119 flux is calculated as the average within a measurement area called the “footprint”, which  
120 can range from several hundred meters to several kilometers windward from the  
121 measurement point (Schuepp et al., 1990). Therefore, EC fluxes at heterogeneous water  
122 sites are different from the fluxes determined by methods that estimate the CO<sub>2</sub> flux in  
123 an area of only several square meters (e.g., the BF method and floating chamber  
124 method). The EC flux is an average flux over a certain time interval (approximately  
125 several tens of minutes) (Lee et al., 2004), whereas the BF method estimates the flux at  
126 the time of sampling. Thus, EC fluxes estimated at sites where fluxes are temporally  
127 variable also differ from fluxes obtained using other methods. Furthermore, the inflow  
128 of terrestrial air into the measurement site can generate uncertainty in the flux  
129 measurement because the atmospheric CO<sub>2</sub> concentration over terrestrial vegetation  
130 may differ significantly from the concentration over water. The inflow of terrestrial air  
131 can cause unnatural temporal changes in the atmospheric CO<sub>2</sub> concentration and spatial  
132 heterogeneity at the measurement site. It is therefore necessary to account for the  
133 characteristics of the aquatic environment and apply appropriate post-processing (PP)  
134 procedures (Leinweber et al., 2009) to avoid large uncertainties or biases in EC flux  
135 calculations.

136 In this study, we developed a PP procedure for EC aquatic measurements. This PP  
137 procedure involves the exclusion of erroneous data and correction of unnatural changes  
138 in the atmospheric CO<sub>2</sub> using a series of data-filtering steps. The new process is based  
139 on the idea that cross sensitivity and environmental heterogeneity during flux  
140 measurement cause spikes, drifts, offsets, and long-term variation in the CO<sub>2</sub> and H<sub>2</sub>O  
141 raw data. We compared the results calculated with our new PP procedure to those  
142 obtained using conventional EC PP procedures along with BF flux data as an example



143 of a frequently used method. We then discuss the differences between the conventional  
144 BF and EC fluxes with respect to atmospheric and environmental characteristics.

## 145 **2 Methods**

### 146 **2.1 Field measurements**

147 Continuous EC measurement data were used for the evaluation of the PP procedure and  
148 the analysis of atmospheric-aquatic ecosystem CO<sub>2</sub> exchange. The data were collected  
149 from a brackish lagoon in Japan (the Furen Lagoon, Fig. 1) from 28 May to 21 October  
150 2014, during which time the water surface was not frozen. Most of the study area (57.4  
151 km<sup>2</sup>) is covered by seagrass meadows (mainly *Zostera marina*). The water is shallow  
152 (1–2 m), except in a channel that connects the eastern and western basins of the lagoon  
153 (depth = approximately 5 m). Freshwater flows into the western basin through several  
154 rivers that run through the surrounding grass farms, and seawater is exchanged through  
155 the lagoon mouth, which opens to the Okhotsk Sea. A previous study has found that the  
156 air-water CO<sub>2</sub> flux in the lagoon is affected by changes of salinity caused by the inflow  
157 of river water and tides as well as by changes of dissolved inorganic carbon resulting  
158 from biological processes such as photosynthesis (Tokoro et al., 2014). The  
159 measurement platform was built at the same site used in the study of Tokoro et al.  
160 (2014) (N43° 19.775', E145° 15.463'); the effects of photosynthesis and changes in  
161 salinity are most notable at this location in the lagoon (Tokoro et al., 2014).

162 The EC devices used in this study were as follows. Atmospheric CO<sub>2</sub> concentrations  
163 and water vapor were measured with an open-path sensor (LI-7500A, LI-COR, USA).  
164 The three-dimensional (3D) wind velocity, air temperature, and atmospheric pressure  
165 were measured with a 3D  acoustic Doppler velocimeter (CSAT-3, Campbell Scientific,



166 USA). The data were logged and managed by a SMARTFlux system (LI-COR). The  
167 open-path sensor and the wind velocimeter were attached to the platform approximately  
168 3.0–5.5 m above the water surface (the height varied with the tide). The sampling rate  
169 for all data was 10 Hz, and the fluxes (CO<sub>2</sub>, water vapor, and heat) were calculated as  
170 averages over 30-min intervals. Batteries and solar panels were attached to the platform  
171 as a power source. Battery replacement, data collection, and device maintenance were  
172 performed approximately every two weeks. Water temperature and salinity were  
173 measured continuously with a conductivity-temperature sensor (Compact-CT, Alec,  
174 Japan).

## 175 2.2 Calculation of fluxes using the conventional PP procedure (PP1)

176 The air-water CO<sub>2</sub> flux ( $F$ ) was calculated every 30-min using the following equation:

177

$$178 \quad F = \overline{\rho_c'w'} \cdot F_1 + \mu \frac{\rho_c}{\rho_d} \overline{\rho_v'w'} \cdot F_1 + \rho_c \left( 1 + \mu \frac{\rho_v}{\rho_d} \right) \frac{\overline{T_a'w'}}{T_a} \cdot F_2, \quad (1)$$

179

180 where the coefficients  $F_1$  and  $F_2$  are correction terms based on the transfer functions that  
181 correct for the frequency attenuation of the air-sea CO<sub>2</sub> flux caused by the response time  
182 of the sensor, path-length averaging, sensor separation, signal processing, and flux-  
183 averaging time (Massman, 2000). The first term on the right-hand side of Eq. (1) is the  
184 product of  $F_1$  and the uncorrected air-sea CO<sub>2</sub> flux calculated as the covariance of the  
185 CO<sub>2</sub> density  $\rho_c$  and the vertical wind speed  $w$  (the bar and the prime indicate the mean  
186 and the deviation from the mean, respectively). The second and third terms are the  
187 Webb-Pearman-Leuning correction of latent heat and sensible heat, respectively (Webb





188 et al., 1980). The other variables in Eq. (1) are defined as follows:  $\rho_d$  = dry air density;  
189  $\rho_v$  = water vapor density;  $T_a$  = air temperature; and  $\mu$  = ratio of the molar weight of dry  
190 air to that of water vapor. The wind speed was corrected by using a double rotation to  
191 make the average vertical wind speed zero during the 30-min time interval (Lee et al.,  
192 2004). The footprint (measurement area) depends on several factors, including the  
193 measurement height, wind speed, atmospheric stability,  measurement site roughness  
194 ( $10^{-4}$  cm) (Schuepp et al., 1990). This footprint ranged from several hundred square  
195 meters to  several square kilometers on the windward side of the measurement site.

196 The deviation of each parameter in Eq. (1) from the 30-min average was calculated by  
197 subtracting the 30-min average from the instantaneous data after deleting obviously  
198 erroneous data (e.g., negative values of CO<sub>2</sub> or water vapor concentration). Other  
199 corrections to the raw data included coordinate rotation of the 3D wind component  
200 (double rotation; Lee et al., 2004), time lag of the measurement due to the separation of  
201 the CO<sub>2</sub> sensor and the wind velocimeter (covariance maximization; Lee et al., 2000),  
202 exclusion of wind data contaminated by the wind velocimeter flame, and correction of  
203 the measurement noise (statistical tests of Vickers and Mahrt, 1997) based on the default  
204 settings of the data management software (EddyPro 5.1.1, LI-COR).

### 205 **2.3 Calculation of flux using our new PP procedure (PP2)**

206 After calculating the EC flux using the conventional PP procedure (PP1) described in  
207 Sect. 2.2, we recalculated the EC flux using our new procedure (PP2; Fig. 2). The PP2  
208 procedure is mainly based on filtering and excluding erroneous data rather than on the  
209 PKT method of data correction. The PP2 procedure is also focused on aquatic  
210 environments in which the spatial and temporal variations in atmospheric CO<sub>2</sub> are large.

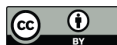

211 The PP2 procedure combines a series of filtering methods based on the received signal  
212 strength indicator (RSSI) of the EC sensor, the normalized standard deviations (nSDs)  
213 of the atmospheric CO<sub>2</sub> and water vapor concentrations, and high-pass (HP) filtering.

214 The RSSI is one of the data concurrently obtained from the CO<sub>2</sub> sensor of the EC  
215 measurement instrumentation and indicates the available signal strength of the sensor.  
216 This parameter has been used for evaluating measurement validation of objective gases  
217 such as methane. In this study, we used the RSSI to filter the CO<sub>2</sub> data because both

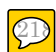

CO<sub>2</sub> and methane absorb infrared radiation. First, data in the 30-min time series were

219 excluded if their RSSI was low. The RSSI threshold for exclusion was set to 90 %,

220 because this percentage was sufficiently high to identify valid CO<sub>2</sub> concentrations and

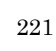

221 we retained most of the measurement data (~81 %) to be retained. This 90 % threshold was

222 also recommended as the quality criterion for the LI-7700 methane analyzer (LI-COR),

223 which has been used to measure methane concentrations.

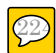

(<http://www.licor.com/env/newslines/2012/04/overcoming-the-challenges-of-open-path->

225 [methane-measurements-with-the-li-7700/](http://www.licor.com/env/newslines/2012/04/overcoming-the-challenges-of-open-path-methane-measurements-with-the-li-7700/)).

226 Second, the criteria for excluding erroneous fluxes were identified. Erroneous fluxes  
227 were identified based on unnatural spikes, jumps, and shifts in the data. Outliers were  
228 excluded based on three statistical parameters: (1) the normalized standard deviation,  
229 nSD (i.e. the SD over a 30-min period divided by the average value for the entire  
230 measurement period after RSSI filtering; (2) skewness; and (3) the absolute value of  
231 kurtosis. Each of these threshold values was determined after the top four outliers for  
232 each parameter were excluded; the raw data (CO<sub>2</sub> concentration, wind speed) associated  
233 with the top four outliers were assumed to be erroneous changes that would not happen  
234 naturally.



235 Finally, HP filtering was applied to the calculation of the deviations from the mean  
236 of each parameters in Eq. (1). This procedure corrected relatively long-term (several  
237 minutes to 30 minutes) variations in CO<sub>2</sub> or water vapor concentrations that were  
238 independent of eddy fluctuations and were caused by the temporal and spatial  
239 heterogeneity of the atmospheric mass. HP filtering is often applied to measurements in  
240 a complex environment; however, incorrect application of HP filtering results in  
241 underestimation of fluxes (Lee et al., 2004). HP filtering was applied by using an  
242 exponential moving average as follows:

243

$$244 \quad \begin{aligned} x_i' &= A(x_i - x_{i-1}) + Ax_{i-1}' \\ A &= \exp\left(-\frac{1}{\tau \cdot f}\right) \end{aligned} \quad (2)$$

245

246 where  $x_i$  and  $x_i'$  are an instantaneous datum and deviation from the mean at time  $i$ ,  
247 respectively. The parameter  $\tau$  is the time constant of the exponential moving average,  
248 which was determined to be 150 s in a previous study (McMillan, 1988), and  $f$  is the  
249 sampling frequency (10 Hz). HP filtering was applied to all of the measured data (i.e.,  
250 3D wind velocity, air temperature, CO<sub>2</sub> and water vapor concentrations, and  
251 atmospheric pressure).

#### 252 2.4 Measurement of fluxes using the BF method

253 BF flux measurements were performed during the daytime on 29 May, 15 July, and 21  
254 September 2014 for comparison with the EC measurements. In the BF method, flux is  
255 calculated as follows:

256



$$257 \quad F = kS(fCO_{2water} - fCO_{2air}), \quad (3)$$

258

259 where  $k$  is the transfer velocity, which was calculated using one or another of the  
260 following three empirical equations. The first was the equation of Wanninkhof (1992)  
261 (W92). Because this equation was constructed using tracer methodology under oceanic  
262 conditions, it might be inappropriate to our measurements because of the differences in  
263 fetch and water depth. However, this equation is very commonly used in a variety of  
264 oceanographic CO<sub>2</sub> flux studies, including coastal measurements. We therefore used it  
265 for comparison. The second equation was that of Borges et al. (2004) (B04), which has  
266 been applied in an estuarine study that involved use of the floating chamber method.  
267 This equation makes use of the current velocity in addition to the wind speed. The third  
268 equation was that of Mørk et al., (2014) (M14), which was formulated to characterize  
269 the transfer velocity in a fjord for use with the EC method. Thus, the second and third  
270 equations can be used to characterize coastal gas transfer velocity. The wind speed for  
271 the gas transfer velocity was measured by the EC device and normalized to a height of  
272 10 m from the water surface using a logarithm law (Kondo, 2000). The current speed  
273 and depth were measured by the sensors attached to the platform (Compact-TC and  
274 Compact-EM, Alec, Japan). The final CO<sub>2</sub> flux was calculated as the weighted average  
275 of the fluxes measured within the EC footprint (Schuepp et al., 1990).

276 The parameter  $S$  is the dissolution coefficient of CO<sub>2</sub>, which was estimated from the  
277 water temperature and salinity (Weiss, 1974). The parameters  $fCO_{2water}$  and  $fCO_{2air}$  are  
278 the fugacity of water and atmospheric CO<sub>2</sub>, respectively. Water temperature and salinity  
279 were measured with a handheld conductivity-temperature-depth sensor (ACTD-DF, JFE  
280 Advantech, Japan). The water samples used to determine  $fCO_{2water}$  were collected just



281 below the water surface (up to 20 cm below the water surface) to measure the  
282 concentration of CO<sub>2</sub> where direct gas exchange with air occurs. The sampling was  
283 performed within the EC footprint to minimize the effect of spatial heterogeneity when  
284 comparing the BF and EC fluxes. The sampling points were determined from the wind  
285 direction and the distance from the platform measured using a hand-held GPS unit  
286 (Venture HC, Garmin, USA; see Table S1). The water *f*CO<sub>2</sub> was determined from the  
287 total alkalinity and the dissolved inorganic carbon content of the water sample using a  
288 batch-type carbonate measurement system (ATT-05, Kimoto electrics, Japan) and the  
289 CO<sub>2</sub>SYS program (Pierrot et al., 2006).

290

### 291 **3 Results**

#### 292 **3.1 PP1 data**

293 During the measurement period, 4464 flux data points corresponding to 2232 hours  
294 were obtained; 1971 of those data points (44 %) were excluded as erroneous data after  
295 PP1 application. The mean and SD of the EC CO<sub>2</sub> fluxes were  $-1.93$  and  $52.4 \mu\text{mol m}^{-2}$   
296  $\text{s}^{-1}$ , respectively. Figure 3(a) shows the retained CO<sub>2</sub> flux data.

297  The largest positive CO<sub>2</sub> flux (release to atmosphere) was  $156.51 \mu\text{mol m}^{-2} \text{s}^{-1}$  at  
298 2:00 on 23 June (day 56). The largest negative CO<sub>2</sub> flux (uptake of atmospheric CO<sub>2</sub>)  
299 was  $-217.93 \mu\text{mol m}^{-2} \text{s}^{-1}$  at 22:00 on 4 October (day 129). These fluxes were more  
300 than three orders of magnitude larger than the magnitude of the average of the measured  
301 EC fluxes. Figure 4 shows the instantaneous atmospheric CO<sub>2</sub> concentration, water  
302 vapor concentration, and the cumulative covariance between CO<sub>2</sub> and vertical wind  
303 speed during the times when the CO<sub>2</sub> fluxes were most positive or most negative.



304 Spikes and discontinuities were observed in the atmospheric CO<sub>2</sub> and water vapor  
305 concentrations, despite the prior de-spiking process applied by the data management  
306 system. The cumulative covariance indicated that the covariance at certain periods (0–5  
307 min) contributed significantly to the total cumulative covariance.

### 308 **3.2 PP2 data**

309 The EC CO<sub>2</sub> flux data subjected to PP2 (RSSI, nSD, and HP filtering) are shown in Fig.  
310 3(b). Of the 2493 total data points remaining after PP1, approximately 234 (9 %) were  
311 excluded by RSSI filtering. Subsequent nSD filtering removed 426 additional data  
312 points (17 %); approximately 73 % of the measurement data remained after this  
313 filtering. The mean and SD of EC CO<sub>2</sub> flux after PP2 were  $-0.54$  and  $2.2 \mu\text{mol m}^{-2} \text{s}^{-1}$ ,  
314 respectively.

315 The nSD threshold was calculate using the averages of the CO<sub>2</sub> and water vapor  
316 concentrations for the entire measurement period after RSSI filtering (CO<sub>2</sub>:  $16.02 \text{ mmol}$   
317  $\text{m}^{-3}$ , vapor:  $548.10 \text{ mmol m}^{-3}$ ). The nSD threshold value obtained from the average  
318 values was 0.050. Other thresholds were 0.48 for skewness and 3.1 for the absolute  
319 value of kurtosis. Among these comparisons, the nSD was determined to provide the  
320 best threshold for the measurement data because the number of data remaining after  
321 filtering was the largest for the nSD (nSD: 1661 [74 %], skewness: 422 [19 %], and the  
322 absolute value of kurtosis: 445 [20 %]). The nSD filtering resulted in the exclusion of

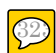

137 (6 %) of the CO<sub>2</sub> data points and 569 (25 %) of the water vapor data points. Figure

324

5 shows the three parameters for the EC CO<sub>2</sub> flux data.

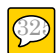

HP filtering decreased the absolute values of some CO<sub>2</sub> fluxes (Fig. 6). Most of the

326

data were not changed very much by HP filtering; however, HP filtering decreased the



327 absolute values of some fluxes.  Figure 7 shows an example of the results of filtering  
328 atmospheric CO<sub>2</sub> concentrations as well as the cumulative covariance of the  
329 atmospheric CO<sub>2</sub> concentrations and vertical wind speed (measured at 8:00 on August  
330 21 [day 84]). These data were not excluded by the RSSI and nSD filtering (RSSI =  
331 100 %, nSD of CO<sub>2</sub> =  $9.84 \times 10^{-3}$ , nSD of H<sub>2</sub>O =  $2.07 \times 10^{-2}$ ). The concentration of  
332 atmospheric CO<sub>2</sub> showed a trend over the 30-min time interval, the indication being that  
333 the block average could not extract appropriate eddy movements from the time-series  
 data. The cumulative covariance of the block averaging (BA) was unusually large; after  
335 HP filtering, the values were more reasonable because filtering successfully excluded  
336 deviations caused by the variation for about 10-min of atmospheric CO<sub>2</sub> concentrations.

### 337 3.3 BF data

338 The measured BF fluxes showed spatial and seasonal variations (see Table S1). The  
339 means and SDs obtained by using the three gas transfer velocity equations to analyze  
340 the weighted averages of the BF CO<sub>2</sub> flux data were  $0.44 \pm 0.33 \mu\text{mol m}^{-2} \text{s}^{-1}$  ( $n = 15$ )  
341 on 29 May (day 1),  $2.10 \pm 1.58 \mu\text{mol m}^{-2} \text{s}^{-1}$  ( $n = 14$ ) on 15 July (day 48), and  $-0.11 \pm$   
342  $0.13 \mu\text{mol m}^{-2} \text{s}^{-1}$  ( $n = 9$ ) on 21 September (day 115). The differences in the number of  
343 data reflect problems during the measurements, such as inadequate water depth and  
344 problems with the water-depth sensor. Except for the measurements on 15 July, the  
345 difference between the results obtained with the three gas transfer velocity equations  
346 were not significant.

## 347 4 Discussion

348 Our new filtering method, PP2, successfully excluded erroneous outliers. The SD was



349 decreased by a factor of 24 ( $52.4 \mu\text{mol m}^{-2} \text{s}^{-1}$  in PP1 to  $2.2 \mu\text{mol m}^{-2} \text{s}^{-1}$  in PP2). The  
350 atmospheric  $\text{CO}_2$  uptake rate calculated via PP1 measurements ( $-1.93 \mu\text{mol m}^{-2} \text{s}^{-1}$ )  
351 was reduced in magnitude by 72 % after PP2 to  $-0.54 \mu\text{mol m}^{-2} \text{s}^{-1}$ . This uptake rate is  
352 more consistent with the range of atmospheric  $\text{CO}_2$  uptake rates reported in previous  
353 studies (e.g. Borges et al., 2005; Chen et al., 2013; Laruelle et al., 2013). The most  
354 negative  $\text{CO}_2$  flux ever reported was  $-1.08 \mu\text{mol m}^{-2} \text{s}^{-1}$  during spring in the Baltic Sea  
355 (Chen et al., 2013).

356 The exclusion of erroneous outliers by PP2 also contributed to the time-series  
357 analysis.  The power spectra of the EC  $\text{CO}_2$  fluxes after PP1 evidenced large, noise-like  
358 fluctuations at high frequencies (Fig. 8), and thus any suggestion of peaks in the time  
359 series was obscured. After PP2, however, the noise-like fluctuations were smaller, and  
360 two peaks associated with semi-diurnal ( $\sim 12.5$  h) and diurnal ( $\sim 24$  h) time intervals  
361 were apparent. The  $f\text{CO}_2$  variations in the lagoon, which are among the parameters that  
362 regulate air-water  $\text{CO}_2$  fluxes, have been confirmed to be related to mixing of lagoon  
363 water with freshwater coming from rivers and with biological processes such as  
364 photosynthesis (Tokoro et al., 2014). Given that the former and latter phenomenon are  
365 caused by the semi-diurnal tidal cycle and diel changes of irradiance, respectively, the  
366 peaks in the power spectra are consistent with the results of Tokoro et al. (2014). This  
367 consistency is a good demonstration of the utility of the PP2.

368 The EC data that were much different from the BF results were excluded by the PP2  
369  (Fig. 9). The remaining EC fluxes in May and September seemed to agree well with the  
370 BF fluxes. We believe that one of the reasons that the results were comparable was the  
371 improvement in the accuracy of the EC fluxes with the use of PP2. Another reason was  
372 our strategy of making BF measurements at multiple points within the EC footprint to





373 filter out the noise associated with the spatial heterogeneity of the BF fluxes. In July, the  
374 BF fluxes estimated with the W92 seemed to be the most consistent with the EC fluxes.  
375 This similarity indicates that the effect of currents in the B04 and the effect of early-  
376 breaking waves in the M14 were overestimated at our measurement site.

377 However, the EC fluxes estimated with PP2 did not always agree with the BF  
378 fluxes. Because the  $fCO_{2\text{water}}$  is theoretically never negative, a theoretical maximum  
379 negative BF flux can be calculated by arbitrarily setting  $fCO_2$  equal to zero. The  
380 maximum negative flux calculated in this way (with M14) was  $-6.16 \mu\text{mol m}^{-2} \text{s}^{-1}$  at  
381 15:00 on 30 May (day 2), when the maximum wind speed was recorded (11.9 m/s).  
382 Forty-seven EC flux data points (3 % of all data) indicated even lower fluxes.  
383 Moreover, the mean of the EC fluxes with PP2 ( $-0.54 \mu\text{mol m}^{-2} \text{s}^{-1}$ ) was more negative  
384 or almost the same as the mean of the theoretical BF fluxes ( $-0.26 \mu\text{mol m}^{-2} \text{s}^{-1}$  in,  $-$   
385  $0.55 \mu\text{mol m}^{-2} \text{s}^{-1}$ , and  $-0.43 \mu\text{mol m}^{-2} \text{s}^{-1}$  estimated with W92, B04, and M14,  
386 respectively). Because actual BF fluxes include less negative as well as positive fluxes,  
387 these EC fluxes cannot be explained by only the BF fluxes.

388 Similar inconsistencies between air-water  $CO_2$  fluxes calculated with the EC method  
389 and other conventional methods have been reported in several studies (e.g., Tsukamoto  
390 et al., 2004; Rutgersson et al., 2010). In the case of coastal measurements, water-side  
391 convection due to the vertical temperature difference inside water has been postulated to  
392 enhance the gas transfer velocity (Rutgersson et al., 2010). However, such an  
393 enhancement was not previously observed with direct flux measurement using a floating  
394 chamber at our site (Tokoro et al., 2014). Because of the very shallow water depth (less  
395 than 2 m) at our site, we suspect that water-side convection was weak and was not the  
396 main reason for the inconsistency of the fluxes.



397 Assuming that the EC fluxes obtained with PP2 are valid, the discrepancy between  
398 the EC and BF fluxes was also postulated to reflect the limitations of the BF method  
399 and/or the difference of the measurement height of the BF and EC methods; the former  
400 and the latter are at the water surface and the height of the EC devices, respectively. As  
401 for the BF method limitations, seagrass leaves, which reached the water surface during  
402 low tide at the study site, might have affected the physical and chemical conditions at  
403 the water surface (Watanabe and Kuwae, 2015). In BF theory, the CO<sub>2</sub> flux is caused by  
404 the CO<sub>2</sub> concentration gradient just below the water surface. The BF method should  
405 therefore not be applied when seagrass is present on the water surface. A previous study  
406 that investigated the radiocarbon isotopic signatures of seagrass at the study site  
407 indicated that of the total CO<sub>2</sub> assimilated by the seagrass, 0–40 % (mean = 17 %)   
408 originated from the atmosphere and the rest from the water (Watanabe and Kuwae,  
409 2015). The implication is that there is direct uptake of atmospheric CO<sub>2</sub> (rather than  
410 uptake through the water column) by seagrass when seagrass leaves are on the water  
411 surface. Atmospheric CO<sub>2</sub> is therefore directly taken up within a thin film of water over  
412 the seagrass leaves, but this seagrass-driven CO<sub>2</sub> flux is not included in the BF flux  
413 calculations.

414 The fact that the CO<sub>2</sub> flux was larger than the BF flux may have been partly caused  
415 by the temperature and CO<sub>2</sub> gradients in the atmospheric layer between the EC  
416 measurement height and the water surface. Vertical gradients in air temperature  
417 frequently occur because of the large difference in temperature between the atmosphere  
418 and water. Indeed, the difference between the temperature at the EC measurement  
419 height and the water temperature ( $\Delta T$ ) ranged from +8 °C to –10 °C during the  
420 measurement period (Fig. 10). The atmospheric CO<sub>2</sub> concentration was inversely



421 proportional to air temperature, mainly because of the ideal gas law. The inflow of air  
422 masses with different temperatures and CO<sub>2</sub> concentrations from other regions  
423 surrounding the lagoon (e.g., terrestrial environments and open sea) could also have  
424 contributed to this inverse relationship. We therefore believe that the  $\Delta T$  caused a  
425 vertical gradient in atmospheric CO<sub>2</sub> concentration, the result being a vertical CO<sub>2</sub> flux  
426 in accord with Fick's law. Indeed, the absolute values of the EC CO<sub>2</sub> fluxes were large  
427 when  $\Delta T$  was large (Fig. 11b). For example, a large negative EC flux that was more than  
428 10 times the maximum negative BF flux was observed when the  $\Delta T$  was negative and  
429 large in magnitude. This phenomenon frequently occurs when a cold air mass overlies a  
430 warm air mass (Fig. 11a). The opposite phenomenon is observed when a warm air mass  
431 overlies a cold air mass (Fig. 11b). The positive temperature gradient did not result in a  
432 large EC flux similar to the flux associated with the negative temperature gradient  
433 because the positive temperature gradient produced stable stratification and thereby  
434 prevented vertical eddy movement and CO<sub>2</sub> flux, a phenomenon observed in the case of  
435 terrestrial EC fluxes at night (Aubinet and Feigenwinter, 2010). Nevertheless, a  
436 temperature gradient-driven vertical CO<sub>2</sub> flux may explain the discrepancy between the  
437 EC and BF fluxes.

438 In summary, we attribute the discrepancy between the EC and BF fluxes to the  
439 following four factors: (1) major technical uncertainties in both methods; (2) differences  
440 in measurement location and in the temporal scales of the measurements; (3) limitations  
441 of the BF method related to the presence of vegetation on the water surface; and (4) the  
442 gradient of atmospheric conditions between the height of the EC measurements and just  
443 above the water surface (Table 1). The latter two factors may cause the EC CO<sub>2</sub> flux to  
444 be larger than the BF flux in aquatic systems that have large amounts of vegetation or



445 are located where temperature gradients form in the atmospheric boundary layer.  
446 Determination of the contribution of aquatic ecosystems to mitigating the adverse  
447 effects of climate change will require consideration of all processes related to  
448 atmosphere-aquatic ecosystem exchange. For this purpose, the EC CO<sub>2</sub> flux should be a  
449 more robust indicator than the BF flux, which includes only processes related to air-  
450 water exchanges. Improving the EC method is therefore essential for a re-evaluation of  
451 atmosphere-aquatic ecosystem CO<sub>2</sub> gas exchanges and comprehensive analyses of the  
452 contributions of aquatic environments to mitigating the adverse effects of climate  
453 change.

454

455 *Competing interests.* The authors declare that they have no conflict of interests.

456

457 *Acknowledgements.* We thank K. Watanabe, H. Moki, E. Miyoshi, and S. Montani for  
458 help with the field work and F. Kondo and H. Ikawa for helpful comments. This study  
459 was supported by a Grant-in-Aid for Challenging Exploratory Researches (no.  
460 24656316 and 26630251) from the Japan Society for the Promotion of Science and a  
461 Strategic R&D Area Project (S-14) of the Environmental Research and Technology  
462 Development Fund (Strategic Research on Global Mitigation and Local Adaptation to  
463 Climate Change).

#### 464 **References**

- 465 Aubinet, M. and Feigenwinter, C.: Direct CO<sub>2</sub> advection measurements and the night  
466 flux problem, *Agr. Forest Meteorol.*, 150, 651–654, 2010.
- 467 Blomquist, B. W., Huebert, B. J., Fairall, C. W., Bariteau, L., Edson, J. B., Hare, J. E.

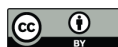

- 468 and McGillis, W. R.: Advances in Air-Sea CO<sub>2</sub> Flux Measurement by Eddy  
469 Correlation, *Bound-Lay. Meteorol.*, 152, 245–276, 2013.
- 470 Borges, A. V., Vanderborght, J. P., Schiettecatte, L. S., Gazeau, F., Ferrón-Smith, S.,  
471 Delille, B. and Frankignoulle, M.: Variability of the gas transfer velocity of CO<sub>2</sub>  
472 in a macrotidal estuary (the Scheldt), *Estuaries*, 27, 593–603, 2004.
- 473 Borges, A. V., Delille, B., and Frankignoulle, M.: Budgeting sinks and sources of CO<sub>2</sub> in  
474 the coastal ocean: Diversity of ecosystems counts, *Geophys. Res. Lett.*, 32,  
475 L14601, 2005.
- 476 Borges, A. V., Schiettecatte, L. S., Abril, G., Delille, B. and Gazeau, F.: Carbon dioxide  
477 in European coastal waters, *Estuar. Coast. Shelf S.*, 70, 375–387, 2006.
- 478 Broecker, W. S., and Peng, T-H.: *Tracers in the sea*, the Lamont-Doherty Geological  
479 Observatory, New York, 1982.
- 480 Chen, C. T. A., Huang, T. H., Chen, Y. C., Bai, Y., He, X. and Kang, Y.: Air-sea  
481 exchanges of coin the world’s coastal seas, *Biogeosciences*, 10, 6509–6544,  
482 2013.
- 483 Danckwerts, P. V.: Significant of liquid-film coefficient in gas absorption, *Ind. Eng.*  
484 *Chem.*, 43, 1460-1467, 1951.
- 485 Frankignoulle, M.: Field-measurements of air sea CO<sub>2</sub> exchange, *Limnol. Ocean.*, 33,  
486 313-322, 1988.
- 487 Garbe, C. S., Rutgersson, A., Boutin, J., de Leeuw, G., Delille, B., Fairall, W., Gruber,  
488 N., Hare, J., Ho, D. T., Johnson, M. T., Nightingale, P. D., Pettersson, H.,  
489 Piskozub, J., Salée, E., and Tsai, W-t.: Transfer across the air-sea interface, in:  
490 *Open-atmosphere interaction of gases and particles*, Springer, Heidelberg, 55-  
491 122, 2014.

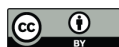

- 492 Gazeau, F., Duarte, C. M., Gattuso, J. P., Barrón, C., Navarro, N., Ruiz, S., Prairie, Y. T.,  
493 Calleja, M., Delille, B., Frankignoulle, M., and Borges, A. V.: Whole-system  
494 metabolism and CO<sub>2</sub> fluxes in a Mediterranean Bay dominated by seagrass beds  
495 (Palma Bay, NW Mediterranean), *Biogeosciences*, 2, 43–60, 2005.
- 496 Ho, D. T., Law, C. S., Smith, M. J., Schlosser, P., Harvey, M., and Hill, P.: Measurement  
497 of air-sea gas exchange at high wind speeds in the Southern Ocean: Implications  
498 for global parametrization, *Geophys. Res. Lett.*, 33, L16611, 2006.
- 499 Ho, D. T., Ferrón, S., Engel, V. C., Larsen, L. G., and Barr, J. D.: Air-water gas  
500 exchange and CO<sub>2</sub> flux in a mangrove-dominated estuary, *Geophys. Res. Lett.*,  
501 41, 108-113, 2014.
- 502 Ikawa, H. and Oechel, C.: Temporal variations in air-sea CO<sub>2</sub> exchange near large kelp  
503 beds near San Diego, California, *J. Geophys. Res- Oceans*, 120, 50–63, 2014.
- 504 IPCC: Climate Change 2013: The Physical Science Basis. Contribution of Working  
505 Group I to the Fifth Assessment Report of the Intergovernmental Panel on  
506 Climate Change [Stocker, T. F., D. Qin, G.-K. Plattner, M. Tignor, S. K. Allen, J.  
507 Boschung, A. Nauels, Y. Xia, V. Bex and P. M. Midgley (eds.)]. Cambridge  
508 University Press, Cambridge, United Kingdom and New York, NY, USA, 2013.
- 509 Kohsiek, W.: Water vapor cross-sensitivity of open path H<sub>2</sub>O/CO<sub>2</sub> sensors, *J. Atmos.*  
510 *Ocean. Tech.*, 17, 299–311, 2000.
- 511 Komori, S., Nagaosa, R., and Murakami, Y.: Turbulent structure and heat and mass  
512 transfer mechanism at a gas-liquid interface in a wind-wave tunnel, *Appl. Sci.*  
513 *Res.*, 51, 423-427, 1993.
- 514 Kondo, F., Ono, K., Mano, M., Miyata, A. and Tsukamoto, O.: Experimental evaluation  
515 of water vapor cross-sensitivity for accurate eddy covariance measurement of



- 516 CO<sub>2</sub> flux using open-path CO<sub>2</sub>/H<sub>2</sub>O gas analysers, *Tellus B*, 66, 2014.
- 517 Kondo, J.: Atmospheric Science near the Ground Surface, University of Tokyo Press,  
518 Japan, 2000.
- 519 Kuwae, T., Kanda, J., Kubo, A., Nakajima, F., Ogawa, H., Sohma, A. and Suzumura,  
520 M.: Blue carbon in human-dominated estuarine and shallow coastal systems,  
521 *Ambio*, 45, 290–301, 2016.
- 522 Laruelle, G. G., Dürr, H. H., Lauerwald, R., Hartmann, J., Slomp, C. P., Goossens, N.,  
523 and Regnier, P. A. G.: Global multi-scale segmentation of continental and coastal  
524 waters from the watersheds to the continental margins, *Hydrol. Earth. Syst. Sci.*,  
525 17, 2029-2051, 2013.
- 526 Landwehr, S., Miller, S. D., Smith, M. J., Saltzman, E. S. and Ward, B.: Analysis of the  
527 PKT correction for direct CO<sub>2</sub> flux measurements over the ocean, *Atmos. Chem.*  
528 *Phys.*, 14, 3361–3372, 2014.
- 529 Lee, X., Massman, W. and Law, B. (Eds.): Handbook of Micrometeorology -A Guide  
530 for Surface Flux Measurement and Analysis, Kluwer Academic Publishers,  
531 Dordrecht, 2004.
- 532 Leinweber, A., Gruber, N., Frenzel, H., Friederich, G. E. and Chavez, F. P.: Diurnal  
533 carbon cycling in the surface ocean and lower atmosphere of Santa Monica Bay,  
534 California, *Geophys. Res. Lett.*, 36, 2009.
- 535 Lewis, W. K. and Whitman, W.: Principle of gas absorption, *Ind. Eng. Chem.*, 16, 1215-  
536 1220, 1924.
- 537 Liss, P. S., and Merlivat, L.: Air-sea gas exchange rates: Introduction and synthesis, in:  
538 The role of air-sea exchange in geochemical cycling, Reidel, Boston, 113-129,  
539 1986.

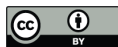

- 540 Massman, W. J.: A simple method for estimating frequency response corrections for  
541 eddy covariance systems, *Agr. Forest Meteorol.*, 104, 185–198, 2000.
- 542 McMillen, R. T.: An eddy correlation technique with extended applicability to non-  
543 simple terrain, *Bound-Lay. Meteorol.*, 43, 231–245, 1988.
- 544 Mørk, E. T., Sørensen, L. L., Jensen, B. and Sejr, M. K.: Air-Sea CO<sub>2</sub> gas transfer  
545 velocity in a shallow estuary, *Bound-Lay. Meteorol.*, 151, 119–138, 2014.
- 546 O’Conner, D. J., and Dobbins, W. E.: Mechanism of reaeration in natural streams,  
547 *Trans. Am. Soc. Civ. Eng.*, 123, 641–684, 1958.
- 548 Pierrot, D., Lewis, E. and Wallace, D. W. S.: MS Excel program developed for CO<sub>2</sub>  
549 system calculations. Oak Ridge National Laboratory, Oak Ridge, USA, 2006.
- 550 Prytherch, J., Yelland, M. J., Pascal, R. W., Moat, B. I., Skjelvan, I. and Neill, C. C.:  
551 Direct measurements of the CO<sub>2</sub> flux over the ocean: Development of a novel  
552 method, *Geophys. Res. Lett.*, 37, 2010.
- 553 Rutgersson, A., and Smedman, A.: Enhanced air-sea CO<sub>2</sub> transfer due to water-side  
554 convection, *J. Mar. Sys.*, 80, 125–134, 2010.
- 555 Schindler, D. E., Carpenter, S. R., Cole, J. J., Kitchell, J. F., and Pace, M. L.: Influence  
556 of food web structure on carbon exchange between lakes and the atmosphere.  
557 *Science*, 277, 248–251, 1997
- 558 Schuepp, P. H., Leclerc, M. Y., MacPherson, J. I. and Desjardins, R. L.: Footprint  
559 prediction of scalar fluxes from analytical solutions of the diffusion equation,  
560 *Bound-Lay. Meteorol.*, 50, 355–373, 1990.
- 561 Tokoro, T., Hosokawa, S., Miyoshi, E., Tada, K., Watanabe, K., Montani, S., Kayanne,  
562 H. and Kuwae, T.: Net uptake of atmospheric CO<sub>2</sub> by coastal submerged aquatic  
563 vegetation, *Glob. Change Biol.*, 20, 1873–1884, 2014.





- 564 Tokoro, T., Kayanne, H., Watanabe, A., Nadaoka, K., Tamura, H., Nozaki, K., Kato, K.  
565 and Negishi, A.: High gas-transfer velocity in coastal regions with high energy-  
566 dissipation rates, *J. Geophys. Res- Oceans*, 113, 2008.
- 567 Tsukamoto, O., Takahashi, S., Kono, T., Yamashita, E., Murata, A., and Ishida, H.: Eddy  
568 covariance CO<sub>2</sub> flux measurements over open ocean; paper presented at the 13<sup>th</sup>  
569 Symposium on the Interaction of the Sea and Atmosphere, *Am. Meteorol. Soc.*,  
570 8-13, 2004.
- 571 Vesala, T.: Eddy covariance measurements over lakes, in: *Eddy covariance: A practical*  
572 *guide to measurement and data analysis*, Springer, Dordrecht, Germany, 365-  
573 376, 2012.
- 574 Vickers, D. and Mahrt, L.: Quality control and flux sampling problems for tower and  
575 aircraft data, *J. Atmos. Ocean. Tech.*, 14, 512–526, 1997.
- 576 Wanninkhof, R.: Relationship between wind speed and gas exchange over the ocean, *J.*  
577 *Geophys. Res.*, 97, 7373–7382, 1992.
- 578 Watanabe, K. and Kuwae, T.: Radiocarbon isotopic evidence for assimilation of  
579 atmospheric CO<sub>2</sub> by the seagrass *Zostera marina*, *Biogeosciences*, 12, 6251–  
580 6258, 2015.
- 581 Webb, E. K., Pearman, G. I. and Leuning, R.: Correction of flux measurements for  
582 density effects due to heat and water vapour transfer, *Q. J. Roy. Meteor. Soc.*,  
583 106, 85–100, 1980.
- 584 Weiss, R. F.: Carbon dioxide in water and seawater: the solubility of a non-ideal gas,  
585 *Mar. Chem.*, 2, 203–215, 1974.
- 586 Zeebe, R. E., and Wolf-Gladrow, D.: Kinetics. in: *CO<sub>2</sub> in Seawater: Equilibrium,*  
587 *Kinetics, Isotope*, Elsevier, Amsterdam, 85–140, 2001.



588 **Table 1.** Summary of the differences in fluxes calculated by the EC and BF methods

|                                                                       | <b>EC</b>                                                                                                       | <b>BF</b>                                                       |
|-----------------------------------------------------------------------|-----------------------------------------------------------------------------------------------------------------|-----------------------------------------------------------------|
| Major sources of uncertainty                                          | - Cross sensitivity<br>- Long-term variation (minutes) of CO <sub>2</sub> and water vapor concentrations in air | - Wind-dependent formula<br>- Heterogeneity of measurement site |
| Measurement location and scales                                       | - CO <sub>2</sub> flux at EC devices<br>- 100 m to km                                                           | - CO <sub>2</sub> flux at the air-water surface<br>- < 100 m    |
| Vegetation on the water surface                                       | - effect included                                                                                               | - effect not included                                           |
| Atmospheric gradient between the measurement height and water surface | - effect included                                                                                               | - effect not included                                           |

589

590



591 **Figure captions**

592 **Figure 1.** Location of the measurement site (Furen Lagoon, Hokkaido, Japan). The  
593 lagoon is shallow (1–2 m). Shading indicates seagrass meadows. Eddy covariance (EC)  
594 measurements were performed on the platform in 2014.

595

596 **Figure 2.** Post-processing (PP) methods for EC flux calculation. The EC CO<sub>2</sub> flux was  
597 calculated by using the conventional PP method (PP1) in EddyPro. The corrections  
598 involved in PP1 have been described in previous publications (e.g., Lee et al., 2004).  
599 Detrending was performed by using block averaging (BA). Our new PP method (PP2)  
600 included three data-filtering steps based on the received signal strength indication of the  
601 CO<sub>2</sub> sensor and the standard deviation of the CO<sub>2</sub> and water vapor concentrations  
602 divided by the corresponding average standard deviation during the measurement period  
603 (nSD). Detrending in PP2 was performed by using high-pass filtering (Massman, 2000).

604

605 **Figure 3.** EC CO<sub>2</sub> fluxes with (a) PP1 (mean:  $-1.93 \mu\text{mol m}^{-2} \text{s}^{-1}$ , SD:  $52.4 \mu\text{mol m}^{-2}$   
606  $\text{s}^{-1}$ ,  $n = 2502$ ) and with (b) PP2 (mean:  $-0.54 \mu\text{mol m}^{-2} \text{s}^{-1}$ , SD:  $2.2 \mu\text{mol m}^{-2} \text{s}^{-1}$ ,  $n =$   
607  $1,833$ ). Several data points in panel (a) are off the scale and not shown for comparison  
608 with (b), in which all data are shown. The red line in (b) shows the theoretical maximum  
609 negative flux estimated from the BF method ( $-2.96 \mu\text{mol m}^{-2} \text{s}^{-1}$ ).

610

611 **Figure 4.** Instantaneous atmospheric CO<sub>2</sub> concentration (a), water vapor (atmospheric  
612 H<sub>2</sub>O) concentration (b), and cumulative covariance of atmospheric CO<sub>2</sub> concentration  
613 and vertical wind speed calculated with PP1 when the CO<sub>2</sub> fluxes (c) showed the largest



614 positive value ( $156.5 \mu\text{mol m}^{-2} \text{s}^{-1}$ ; blue) and the largest negative value ( $-217.9 \mu\text{mol}$   
615  $\text{m}^{-2} \text{s}^{-1}$ ; red). Note that the covariance was not equal to the  $\text{CO}_2$  flux because there was  
616 no Webb-Pearman-Leuning correction.

617

618 **Figure 5.** Comparison between the effects of the three filtering parameters and the  $\text{CO}_2$   
619 flux after the RSSI filtering procedure. The red circles indicate the top four outliers for  
620 each parameter, which were determined as erroneous (not natural) fluxes. Each  
621 threshold (broken red line) was determined so as to remove these data. (a) Normalized  
622 standard deviation ( $\text{nSD} = \text{standard deviation over 30-min divided by the average}$   
623 during the entire measurement period; threshold = 0.05; 74 % of data retained). (b)  
624 Skewness (threshold = 0.48; 19 % of data retained). (c) Absolute value of kurtosis  
625 (threshold = 3.1; 20 % of data retained).

626

627 **Figure 6.** Comparison of  $\text{CO}_2$  fluxes calculated by the block averaging (BA) method  
628 and EC flux with HP filtering. Most of the data lay on or close to the solid line ( $y = x$ )  
629 and were not much changed by HP filtering. However, in the case of the data in the  
630 shaded area, HP filtering decreased the absolute value of fluxes by removing the long-  
631 term effect of  $\text{CO}_2$  change (see Fig. 7).

632

633 **Figure 7.** Examples of the deviation calculations of atmospheric  $\text{CO}_2$  concentration (a)  
634 and the cumulative covariance of atmospheric  $\text{CO}_2$  concentration and vertical wind  
635 speed (b).

636

637 **Figure 8.** Power spectra of  $\text{CO}_2$  flux with PP1 and PP2. The spectra were normalized



638 using the covariances of CO<sub>2</sub> and vertical wind velocity for the entire measurement  
639 period after PP1 and PP2. The shaded areas indicate the frequency of the 24-h diurnal  
640 cycle (left) and 12.5-h tidal cycle (right). Average CO<sub>2</sub> flux data during the entire  
641 measurement period were used to replace missing CO<sub>2</sub> flux data.

642

643 **Figure 9.** Comparison of BF flux, EC flux with PP1, and EC flux with PP2 in May (a),  
644 July (b) and September (c).

645

646 **Figure 10.** (a) Relationship between air temperatures and atmospheric CO<sub>2</sub>  
647 concentrations. The gray circles indicate the data averaged over 30 min. The open  
648 diamonds and error bars indicate the binned averages every 1 °C and 1 SD, respectively.  
649 The solid line indicates the slope estimated from the change in air volume assuming that  
650 CO<sub>2</sub> behaves as an ideal gas. (b) Relationship and between temperature difference ( $\Delta T$ )  
651 and CO<sub>2</sub> flux. The gray circles indicate the EC flux data calculated every 30 min. The  
652 solid diamonds and error bars indicate the binned averages every 1 °C and 1 SD,  
653 respectively. Note that for clarity not all data are plotted on both graphs.

654

655 **Figure 11.** Schematic diagram showing the relationships between negative temperature  
656 gradient and negative EC CO<sub>2</sub> flux (a) and between positive temperature gradient and  
657 positive EC CO<sub>2</sub> flux (b). The atmospheric CO<sub>2</sub> gradient reflects the air temperature  
658 gradient and assumes that CO<sub>2</sub> behaves like an ideal gas. The temperature gradient-  
659 driven vertical CO<sub>2</sub> flux may explain the discrepancy between the EC and BF fluxes.



Figure 1

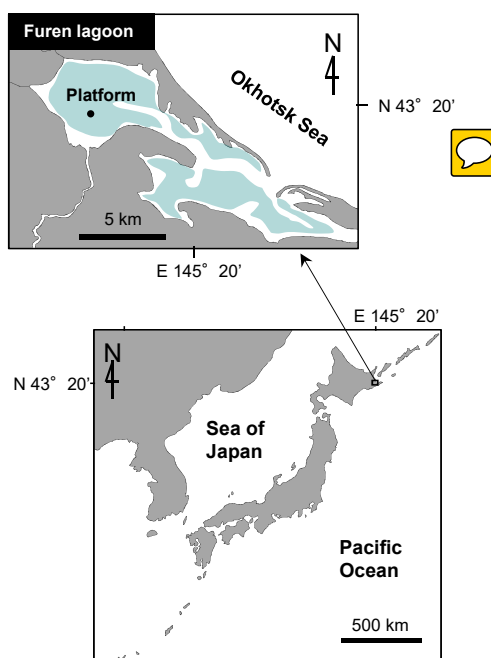



Figure 2

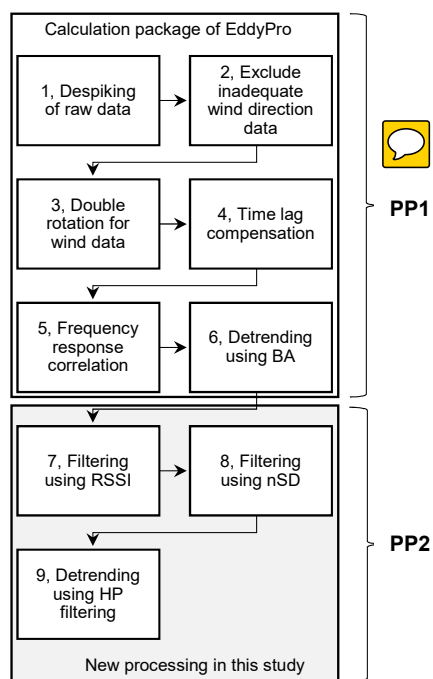



Figure 3

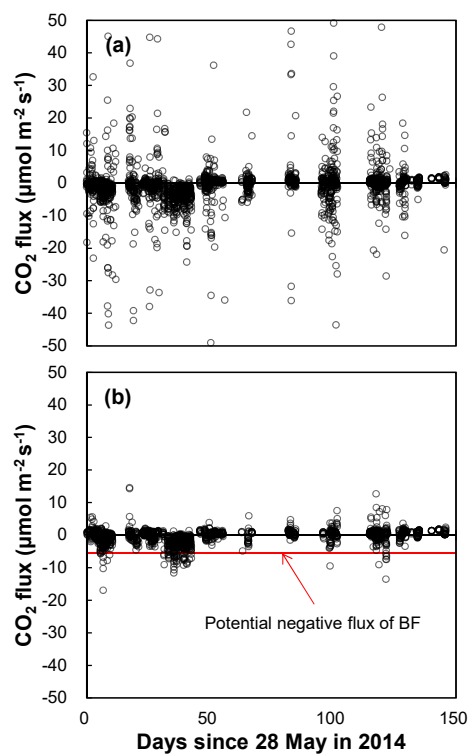





Figure 4

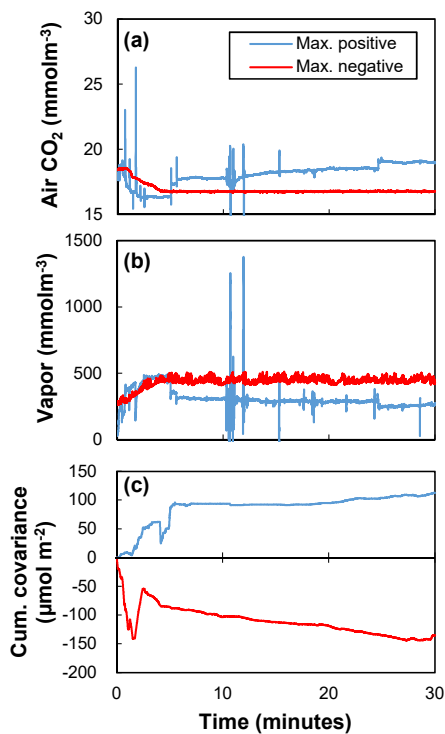



Figure 5

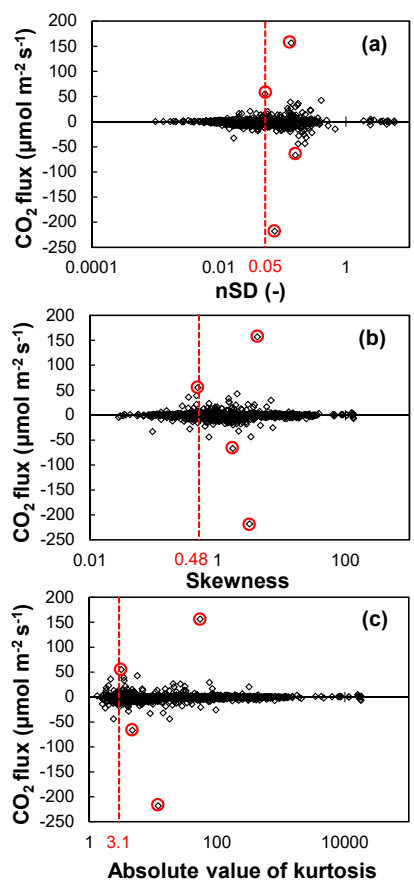



Figure 6

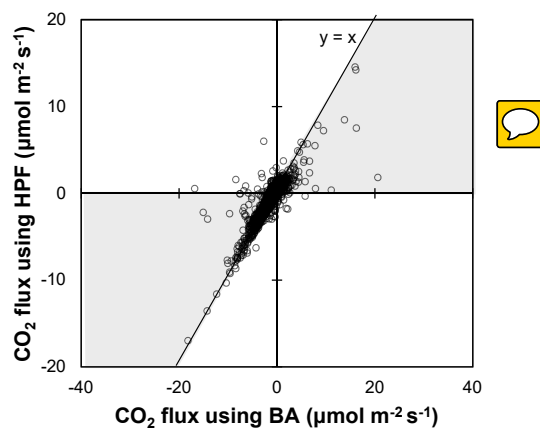



Figure 7

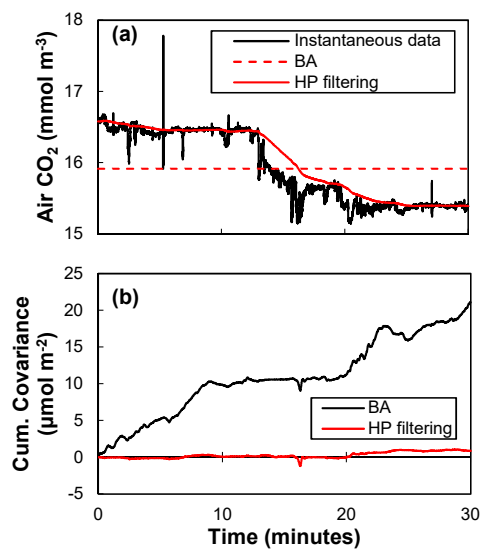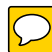



Figure 8

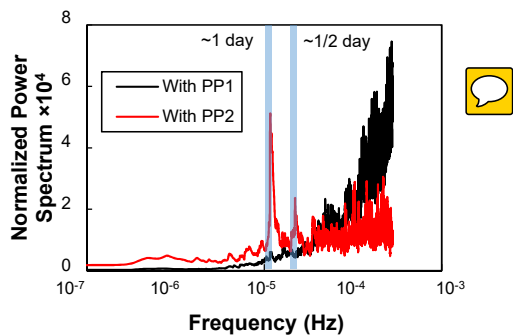



Figure 9

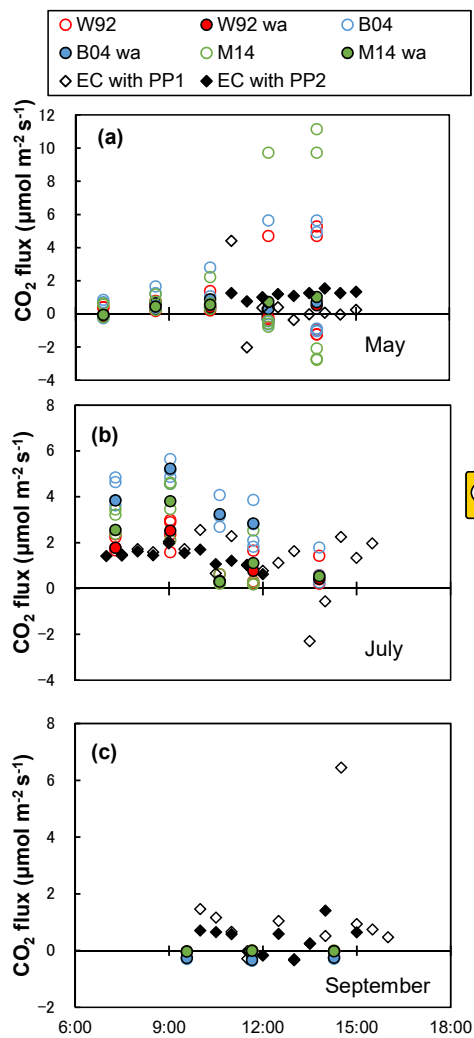



**Figure 10**

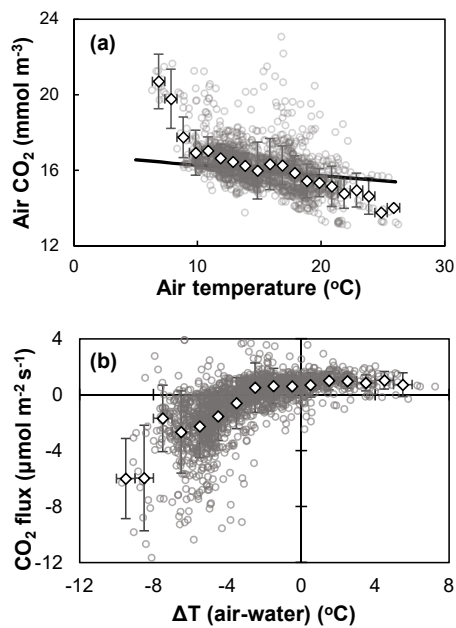



Figure 11

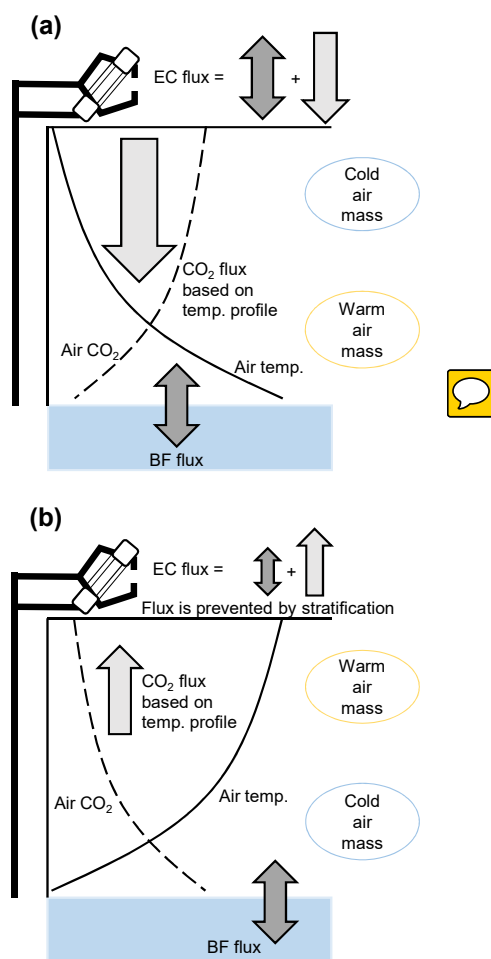

Supplement: Supplementary file [file bg-2017-499-AC3-supplement.pdf]
